# Supplementary material
Source: Springer Nature journal article supplement (https://www.springermedizin.de/resource/supplementary/13049_2009_74_MOESM4_ESM.pdf/9665828)

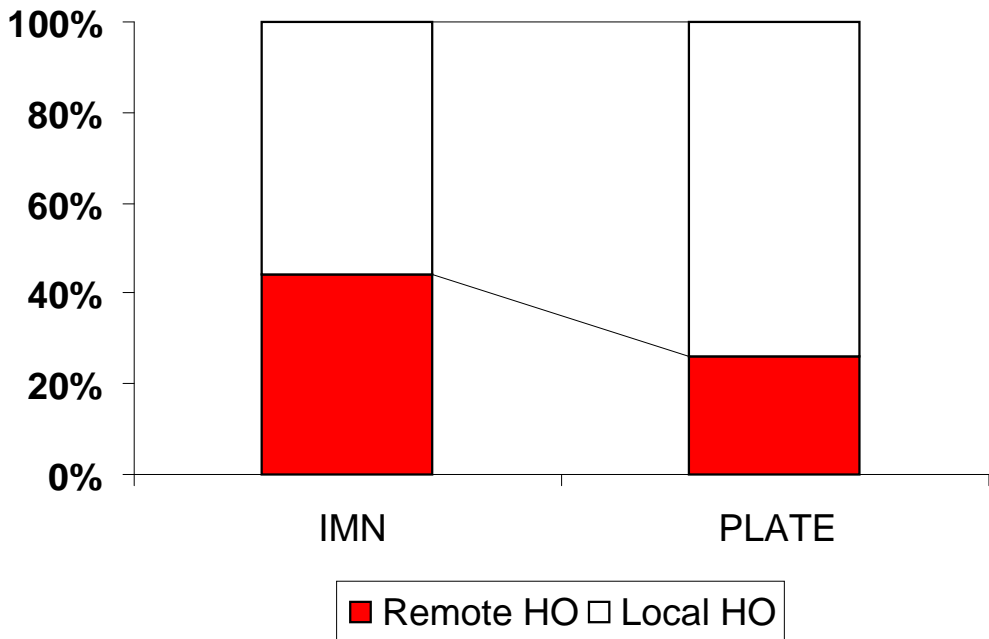

Supplement: MOESM4 [file 9665828]
